# Supplementary material for: Plant and soil nutrient stoichiometry along primary ecological successions: Is there any link?
Source: PubMed Central journal article supplement (PMC5546702; doi:10.1371/journal.pone.0182569), 2017-08-07

site 1  
*Delle Locce Glacier*  
Italy

site 2  
*Umbra Forest*  
Northern Ireland

site 3  
*Belvedere Glacier*  
Italy

site 4  
*Vicentina Coast Park*  
Portugal

EARLY

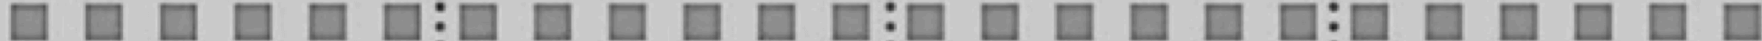

MIDDLE

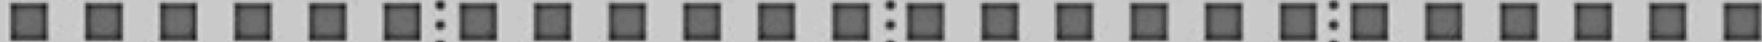

ADVANCED

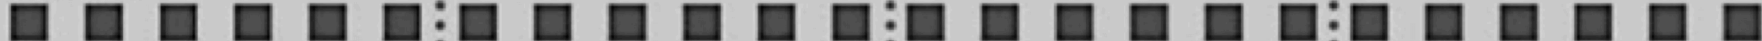

Supplement: pone.0182569.s003.pdf [file pone.0182569.s003.pdf]
