# Supplementary material for: Plant and soil nutrient stoichiometry along primary ecological successions: Is there any link?
Source: PubMed Central journal article supplement (PMC5546702; doi:10.1371/journal.pone.0182569), 2017-08-07
Supplement: pone.0182569.s005.pdf [file pone.0182569.s005.pdf]

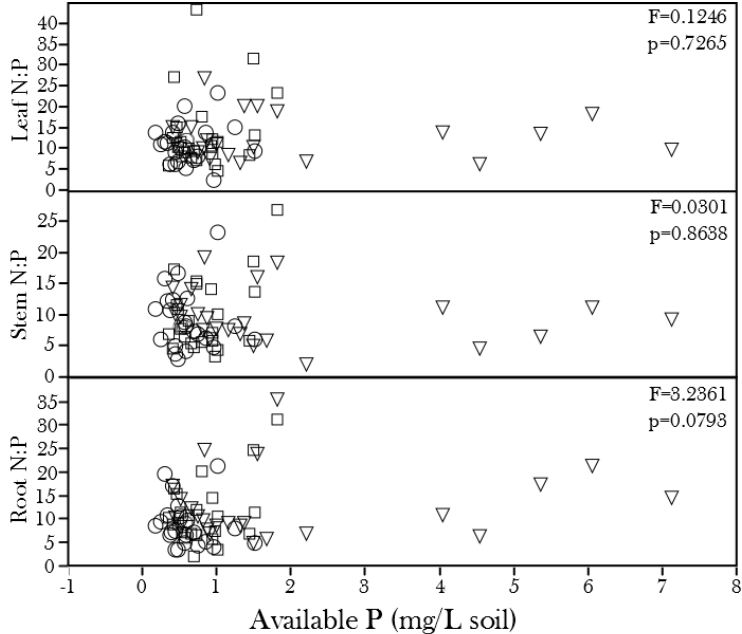

- Early Stage
- Middle Stage
- ▽ Advanced Stage
