# Supplementary material for: Plant and soil nutrient stoichiometry along primary ecological successions: Is there any link?
Source: PubMed Central journal article supplement (PMC5546702; doi:10.1371/journal.pone.0182569), 2017-08-07

## Early

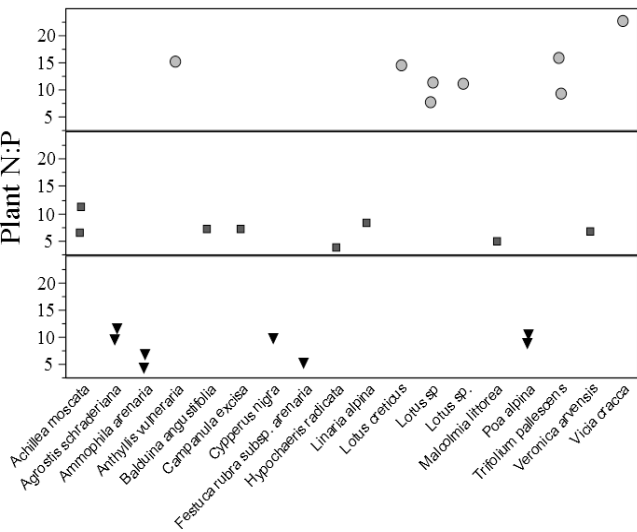

## Middle

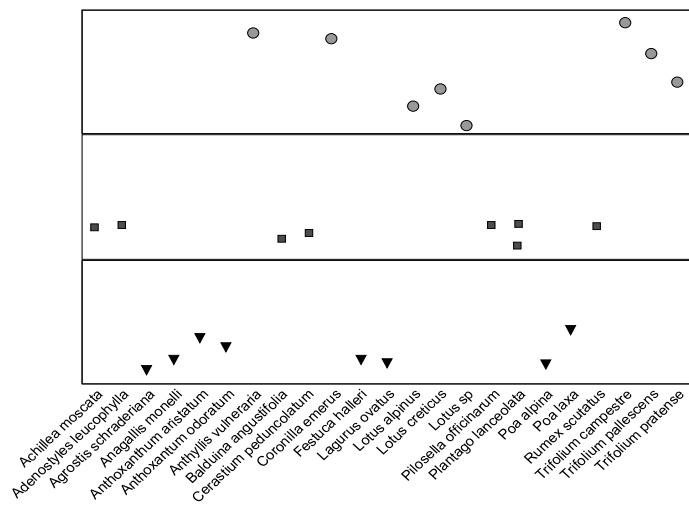

## Advanced

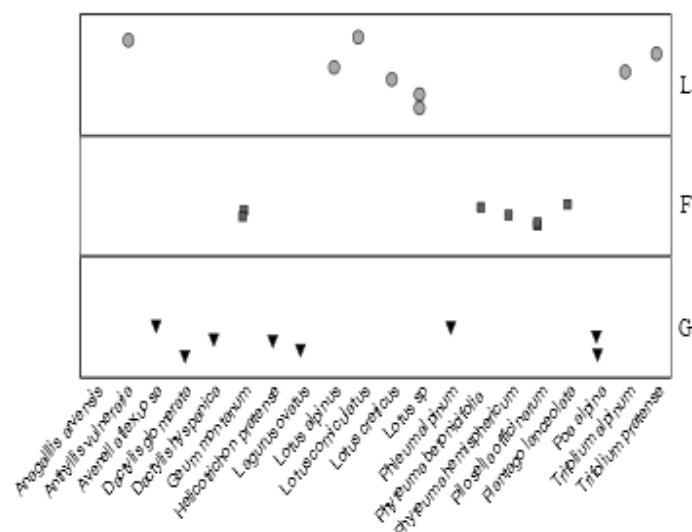

Supplement: pone.0182569.s006.pdf [file pone.0182569.s006.pdf]
