# Supplementary material for: Plant and soil nutrient stoichiometry along primary ecological successions: Is there any link?
Source: PubMed Central journal article supplement (PMC5546702; doi:10.1371/journal.pone.0182569), 2017-08-07
Supplement: pone.0182569.s007.pdf [file pone.0182569.s007.pdf]

| Study sites                        | Annual Mean | Annual Mean   | Soil | Succession Age |         |          |
|------------------------------------|-------------|---------------|------|----------------|---------|----------|
|                                    | Temperature | Precipitation | pH   | (years)        |         |          |
|                                    | (°C)        | (mm)          |      | Early          | Middle  | Advanced |
| Carrapateira<br>Dunes <sup>a</sup> | 15.9        | 563           | 8.7  | <50            | 200-600 | >1000    |
| Umbra<br>Dunes <sup>b</sup>        | 8.5         | 1065          | 8.6  | <50            | 200-600 | >1000    |
| Belvedere<br>Glacier <sup>c</sup>  | 5           | 1695          | 5.5  | <50            | 200-600 | >1000    |
| Locce<br>Glacier <sup>c</sup>      | 5           | 1695          | 5.2  | <50            | 200-600 | >1000    |

## References

- Caccianiga M, Andreis C. (2004) Pioneer herbaceous vegetation on glacier forelands in the Italian Alps. *Phytocoenologia* 34: 55-89.
- Clark ML and Rendell HM. (2006) Effects of storminess, sand supply and the North Atlantic Oscillation on sand invasion and coastal dune accretion in western Portugal. *Holocene* 16: 341-355.
- Dias JMA, Boski T, Rodrigues A, Magalhães F. (2000) Coast line evolution in Portugal since the Last Glacial Maximum until present-a synthesis. *Marine Geology* 170: 177-186.

Körner C. (2003) *Alpine Plant Life: functional plant ecology of high mountain ecosystems*. 2<sup>nd</sup> ed., XI, 349 p. Springer Ed.

Monterin U. (1919) Introduzione allo studio del ghiacciaio italiano del Monte Rosa. *Bollettino del Comitato Glaciologico. Italiano* 3: 105-164.

Moura D, Veiga-Pires C, Albardeiro L, Boski T, Rodrigues AL, Tareco H. (2006) Holocene sea level fluctuations and coastal evolution in the Central Algarve (Southern Portugal). *Marine Geology*, 237, 127-147.

Sacco F. (1938) Il glacialismo piemontese. *L'Universo, Torino*. 19: 217-352.

Smiraglia C. (1992) *Guida ai Ghiacciai e alla Glaciologia*. Zanichelli, Bologna.

Wilson P, McGourty J, Bateman MD. (2004) Mid-to late-Holocene coastal dune event stratigraphy for the north coast of Northern Ireland. *Holocene* 14: 406-416.

Wilson P. (1987) Soil formation on coastal beach and dune sands at Magilligan Point Nature Reserve, Co. Londonderry. *Irish Geography* 20: 43-50.
