# Supplementary material for: Plant and soil nutrient stoichiometry along primary ecological successions: Is there any link?
Source: PubMed Central journal article supplement (PMC5546702; doi:10.1371/journal.pone.0182569), 2017-08-07
Supplement: pone.0182569.s012.pdf [file pone.0182569.s012.pdf]

| <b>Legume Species</b>         | <b>Graminoid Species</b>             | <b>Forb Species</b>            |
|-------------------------------|--------------------------------------|--------------------------------|
| <b><u>Early Stage</u></b>     | <b><u>Early Stage</u></b>            | <b><u>Early Stage</u></b>      |
| <i>Lotus creticus</i> #       | <i>Ammophila arenaria</i> *          | <i>Malcolmia littorea</i>      |
| <i>Lotus sp.</i>              | <i>Cyperus nigra</i>                 | <i>Balduina angustifolia</i>   |
| <i>Anthyllis vulneraria</i> # | <i>Festuca rubia subsp. arenaria</i> | <i>Hypochaeris radicata</i>    |
| <i>Vicia cracca</i>           | <i>Poa alpina</i> *                  | <i>Veronica arvensis</i>       |
| <i>Trifolium pallescens</i> * | <i>Agrostis schraderiana</i> *       | <i>Achillea moscata</i> *      |
| <i>Lotus alpinus</i> *        |                                      | <i>Linaria alpina</i>          |
|                               |                                      | <i>Campanula excisa</i>        |
| <b><u>Middle Stage</u></b>    | <b><u>Middle Stage</u></b>           | <b><u>Middle Stage</u></b>     |
| <i>Lotus creticus</i> #       | <i>Lagurus ovatus</i> #              | <i>Balduina angustifolia</i>   |
| <i>Coronilla emerus</i>       | <i>Anagallis monelli</i>             | <i>Plantago lanceolata</i> *   |
| <i>Anthyllis vulneraria</i> # | <i>Anthoxanthum odoratum</i>         | <i>Pilosella officinarum</i> # |
| <i>Trifolium campestre</i>    | <i>Anthoxanthum aristatum</i>        | <i>Cerastium pedunculatum</i>  |
| <i>Trifolium pallescens</i>   | <i>Agrostis schraderiana</i> #       | <i>Rumex scutatus</i>          |
| <i>Lotus alpinus</i> #        | <i>Poa laxa</i>                      | <i>Achillea moscata</i> #      |
| <i>Trifolium pratense</i>     | <i>Poa alpina</i> #                  | <i>Adenostyles leucophylla</i> |
|                               | <i>Festuca halleri</i>               |                                |

| <u>Advanced Stage</u>         | <u>Advanced Stage</u>         | <u>Advanced Stage</u>          |
|-------------------------------|-------------------------------|--------------------------------|
| <i>Lotus creticus</i> #       | <i>Dactylis hispanica</i>     | <i>Pilosella officinarum</i> * |
| <i>Anthyllis vulneraria</i> # | <i>Lagurus ovatus</i> #       | <i>Anagallis arvensis</i>      |
| <i>Lotus corniculatus</i> *   | <i>Dactylis glomerata</i>     | <i>Plantago lanceolata</i> #   |
| <i>Lotus alpinus</i> #        | <i>Helicotrichon pratense</i> | <i>Geum montanum</i> *         |
| <i>Trifolium pratense</i>     | <i>Poa alpina</i> *           | <i>Phyteuma betonicifolia</i>  |
| <i>Trifolium alpinum</i> *    | <i>Phleum alpinum</i>         | <i>Phyteuma hemisphericum</i>  |
|                               | <i>Avenella flexuosa</i>      |                                |

\* Species found in the same stage (Early, Middle or Advanced) of two different successions (e.g.

*Trifolium alpinum* was found in the advanced stage of both Belvedere and Locce Glaciers).

# Species found in two different successional stages of the same succession (e.g. *Plantago lanceolata* was found in Middle and Advanced stages of the Umbra sand dune system).
