# Supplementary material for: Plant and soil nutrient stoichiometry along primary ecological successions: Is there any link?
Source: PubMed Central journal article supplement (PMC5546702; doi:10.1371/journal.pone.0182569), 2017-08-07
Supplement: pone.0182569.s013.pdf [file pone.0182569.s013.pdf]

| <i>Model</i>    | <i>N variables</i> | <i>R Square</i> | <i>RMSE</i>   | <i>AICc</i>    |
|-----------------|--------------------|-----------------|---------------|----------------|
| <i>Leaf N:P</i> |                    |                 |               |                |
| M1              | 1                  | 0.2696          | 5.7943        | 448.948        |
| <b>M2</b>       | <b>2</b>           | <b>0.2931</b>   | <b>5.7427</b> | <b>448.912</b> |
| M3              | 3                  | 0.3011          | 5.7532        | 450.437        |
| M4              | 4                  | 0.3121          | 5.7517        | 451.727        |
| M5              | 5                  | 0.3163          | 5.7787        | 453.771        |
| M6              | 6                  | 0.3174          | 5.8195        | 456.207        |
| M7              | 7                  | 0.3184          | 5.8620        | 458.745        |
| <i>Stem N:P</i> |                    |                 |               |                |
| M1              | 1                  | 0.3675          | 3.9429        | 400.631        |
| M2              | 2                  | 0.3902          | 3.8998        | 400.282        |
| <b>M3</b>       | <b>3</b>           | <b>0.4191</b>   | <b>3.8346</b> | <b>399.151</b> |
| M4              | 4                  | 0.4441          | 3.7794        | 399.417        |
| M5              | 5                  | 0.4539          | 3.7746        | 399.617        |
| M6              | 6                  | 0.4571          | 3.7929        | 401.745        |
| M7              | 7                  | 0.4602          | 3.8118        | 403.964        |
| <i>Root N:P</i> |                    |                 |               |                |
| M1              | 1                  | 0.2715          | 5.5895        | 450.184        |
| M2              | 2                  | 0.3365          | 5.3736        | 445.803        |
| <b>M3</b>       | <b>3</b>           | <b>0.3666</b>   | <b>5.2894</b> | <b>444.826</b> |

|    |   |        |        |         |
|----|---|--------|--------|---------|
| M4 | 4 | 0.3766 | 5.2868 | 446.078 |
| M5 | 5 | 0.3792 | 5.3162 | 448.246 |
| M6 | 6 | 0.3813 | 5.3486 | 450.553 |
| M7 | 7 | 0.3823 | 5.3867 | 453.070 |

---

***Leaf N:P***

M1: FGs

**M2: Stage; FGs**

M3: Stage; FGs; %P

M4: Stage; FGs; %P; soil N:P

M5: Stage; FGs; AvP; %P; soil N:P

M6: Stage (early; middle; advanced); Stage (middle; advanced); FGs; AvP; %P; soil N:P

M7: Stage (e; m; a), Stage (m; a); FGs; %N; AvP; %P; soil N:P

***Stem N:P***

M1: FGs

M2: FGs; soil N:P

**M3: FGs, Net N min; soil N:P**

M4: Stage (m; a); FGs; Net N min; soil N:P

M5: Stage (m; a); FGs; Net N min; %P; soil N:P

M6: Stage (e; m; a); Stage (m; a); FGs; net N min; %P; soil N:P

M7: Stage (e; m; a); Stage (m; a); FGs; Net N min; %N; %P; soil N:P

***Root N:P***

M1: FGs

M2: FGs; AvP

**M3: Stage (e, m, a); FGs; AvP**

M4: Stage (e, m, a); FGs (G, L, F); FGs (G, F); AvP

M5: Stage (e, m, a); FGs (G, L, F); FGs (G, F); AvP; soil N:P

M6: Stage (e, m, a); Stage (m, a); FGs; AvP; soil N:P

M7: Stage (e, m, a); FGs (G, L, F); FGs (G, F); %N; AvP; %P; soil N:P
